# Supplementary material
Source: PubMed Central journal article supplement (PMC1360733)
Supplement: bj3930797add.pdf [file bj3930797add.pdf]

Supplementary Table 1

|    | <b>ORF</b> | <b>Gene</b> | <b>Total/Unique Peptides</b> | <b>Coverage</b> | <b>Daltons</b> | <b>Protein Function</b>                               |
|----|------------|-------------|------------------------------|-----------------|----------------|-------------------------------------------------------|
| 1  | YDR477W    | SNF1        | 953 / 221                    | 80.10%          | 72045          | alpha subunit of Snf1 kinase complex                  |
| 2  | YER027C    | GAL83       | 861 / 169                    | 86.6%           | 46648          | beta subunit of Snf1 kinase complex                   |
| 3  | YDR028C    | REG1        | 483 / 122                    | 63.50%          | 112616         | regulatory subunit of protein phosphatase type 1      |
| 4  | YGL115W    | SNF4        | 433 / 86                     | 82.90%          | 36401          | gamma subunit of Snf1 kinase complex                  |
| 5  | YDL229W    | SSB1        | 119 / 54                     | 60.70%          | 66602          | HSP70 protein                                         |
| 6  | YNL209W    | SSB2        | 119 / 56                     | 60.70%          | 66595          | HSP70 protein                                         |
| 7  | YGL208W    | SIP2        | 133 / 43                     | 58.80%          | 46405          | beta subunit of Snf1 kinase complex                   |
| 8  | YER177W    | BMH1        | 52 / 22                      | 58.10%          | 30091          | 14-3-3 protein                                        |
| 9  | YDR099W    | BMH2        | 51 / 22                      | 56.00%          | 31061          | 14-3-3 protein                                        |
| 10 | YLL039C    | UBI4        | 40 / 3                       | 5.80%           | 42826          | Ubiquitin polyprotein                                 |
| 11 | YER129W    | SAK1        | 14 / 11                      | 12.30%          | 126872         | Snf1-activating kinase                                |
| 12 | YAL005C    | SSA1        | 10 / 9                       | 14.00%          | 69768          | HSP70 protein                                         |
| 13 | YLL024C    | SSA2        | 10 / 9                       | 13.80%          | 69470          | HSP70 protein                                         |
| 14 | YBL075C    | SSA3        | 9 / 7                        | 8.00%           | 70547          | HSP70 protein                                         |
| 15 | YIL148W    | RPL40A      | 8 / 3                        | 17.20%          | 14554          | ribosomal protein                                     |
| 16 | YLR167W    | RPS3        | 8 / 3                        | 14.50%          | 17216          | ribosomal protein                                     |
| 17 | YKR094C    | RPL40B      | 8 / 3                        | 17.20%          | 14554          | ribosomal protein                                     |
| 18 | YNL178W    | RPS3        | 6 / 5                        | 27.90%          | 26503          | ribosomal protein                                     |
| 19 | YMR277W    | FCP1        | 6 / 2                        | 3.00%           | 83441          | TFIIF-interacting component of the CTD phosphatase    |
| 20 | YJL074C    | SMC3        | 6 / 2                        | 2.00%           | 141336         | Cohesin, coiled-coil protein of the SMC family        |
| 21 | YGR192C    | TDH3        | 5 / 4                        | 20.50%          | 35747          | glyceraldehyde-3-phosphate dehydrogenase 3            |
| 22 | YFR014C    | CMK1        | 5 / 2                        | 6.30%           | 50296          | calmodulin-dependent protein kinase                   |
| 23 | YGR214W    | RPS0A       | 4 / 4                        | 18.30%          | 28024          | ribosomal protein                                     |
| 24 | YLR048W    | RPSOB       | 4 / 4                        | 18.30%          | 27962          | ribosomal protein                                     |
| 25 | YGR130C    |             | 4 / 3                        | 7.70%           | 92698          | Protein of unknown function                           |
| 26 | YJR123W    | RPS5        | 4 / 2                        | 13.80%          | 25039          | ribosomal protein                                     |
| 27 | YKL054C    | DEF1        | 4 / 2                        | 4.30%           | 83973          | Protein involved in vacuolar import and degradation   |
| 28 | YDR145W    | TAF12       | 4 / 2                        | 3.20%           | 61073          | Subunit of TFIID and SAGA complexes                   |
| 29 | YHL008C    |             | 4 / 2                        | 4.10%           | 69969          | Member of the formate-nitrite porter family           |
| 30 | YFL039C    | ACT1        | 3 / 3                        | 7.20%           | 41690          | actin                                                 |
| 31 | YEL030W    | ECM10       | 3 / 3                        | 4.50%           | 70085          | possible cell wall structure or biosynthesis protein  |
| 32 | YKR054C    | DYN1        | 3 / 3                        | 0.90%           | 471351         | heavy chain of cytoplasmic dynein                     |
| 33 | YHR016C    | YSC84       | 3 / 2                        | 4.90%           | 50902          | Protein involved in cortical actin patch polarization |
| 34 | YDL190C    | UFD2        | 3 / 2                        | 3.30%           | 109906         | Ubiquitin fusion degradation protein                  |
| 35 | YHR186C    | KOG1        | 3 / 2                        | 2.60%           | 177608         | Component of the TOR complex 1                        |

|    |         |       |       |        |        |                                               |
|----|---------|-------|-------|--------|--------|-----------------------------------------------|
| 36 | YER013W | PRP22 | 3 / 2 | 2.40%  | 130010 | Pre-mRNA splicing factor                      |
| 37 | YNR001C | CIT1  | 3 / 2 | 2.30%  | 53360  | Citrate synthase                              |
| 38 | YKL182W | FAS1  | 3 / 2 | 2.00%  | 228689 | Fatty-acyl-CoA synthase                       |
| 39 | YGR270W | YTA7  | 3 / 2 | 1.80%  | 157406 | member of CDC48/PAS1/SEC18 family of ATPases  |
| 40 | YJL020C | BBC1  | 2 / 2 | 2.40%  | 128296 | possible actin cytoskeleton protein           |
| 41 | YGL162W | SUT1  | 2 / 2 | 12.70% | 33191  | zinc cluster transcription factor             |
| 42 | YOR187W | TUF1  | 2 / 2 | 6.20%  | 47972  | Translation elongation factor Tu              |
| 43 | YJL102W | MEF2  | 2 / 2 | 5.70%  | 91283  | mitochondrial translation elongation factor G |
| 44 | YML106W | URA5  | 2 / 2 | 5.30%  | 24664  | Orotate phosphoribosyltransferase 1           |
| 45 | YNL096C | RPS7B | 2 / 2 | 4.20%  | 21634  | ribosomal protein                             |
| 46 | YOR096W | RPS7A | 2 / 2 | 4.20%  | 21622  | ribosomal protein                             |
| 47 | YHR103W | SBE22 | 2 / 2 | 4.10%  | 96398  | Protein required for bud growth               |
| 48 | YNL039W | BDP1  | 2 / 2 | 3.70%  | 67688  | TFIIIB subunit                                |
| 49 | YMR266W | RSN1  | 2 / 2 | 2.80%  | 107672 | Possible membrane transporter                 |
| 50 | YGL195W | GCN1  | 2 / 2 | 0.70%  | 296697 | activator of Gcn2p protein kinase             |
